# Supplementary material for: Structure and dynamics in an organic ionic plastic crystal, N-ethyl-N-methyl pyrrolidinium bis(trifluoromethanesulfonyl) amide, mixed with a sodium salt
Source: Royal Society of Chemistry journal article supplement (doi:10.1039/c3ta15153k), 2014-01-01
Supplement: c3ta15153k.pdf [file c3ta15153k.pdf]

## SUPPLEMENTARY

| NaNTf <sub>2</sub> | Phase IV-III |                      | Phase III-II |                      | Phase II-I |                      | Eutectic |                      | melt  |                      |
|--------------------|--------------|----------------------|--------------|----------------------|------------|----------------------|----------|----------------------|-------|----------------------|
| / % mol            | T/ °C        | ΔH /Jg <sup>-1</sup> | T/ °C        | ΔH /Jg <sup>-1</sup> | T/ °C      | ΔH /Jg <sup>-1</sup> | T/ °C    | ΔH /Jg <sup>-1</sup> | T/ °C | ΔH /Jg <sup>-1</sup> |
| 0                  | -84          | 4.6                  | 18           | 1.9                  | 42         | 0.1                  | -        | -                    | 91    | 24.7                 |
| 1                  | -84          | 5.6                  | 17           | 1.9                  | 42         | 0.1                  | 62       | 0.6                  | 89    | 20.7                 |
| 6                  | -85          | 4.0                  | 18           | 2.2                  | 42         | 0.1                  | 63       | 6.5                  | 80    | 12.9                 |
| 15                 | -84          | 4.1                  | 18           | 1.5                  | 42         | 0.1                  | 65       | 32.5                 |       |                      |
| 35                 | -87          | 0.3                  | 18           | 0.8                  | 46         | 0.1                  | 64       | 18.1                 | 82    | 2.6                  |
| 40                 | -87          | 0.3                  | 18           | 0.6                  | 46         | 0.2                  | 65       | 12.5                 | 81    | 3.8                  |
| 45                 | -86          | 0.3                  | 19           | 0.7                  | 46         | 0.2                  | 65       | 16.9                 | 81    | 4.8                  |
| 50                 | -86          | 0.3                  | 18           | 0.8                  | 42         | 0.2                  | 62       | 6.7                  | 82    | 5.8                  |

Table S1: Enthalpy (in J/g) for the phase transitions calculated from the area under the peaks in DSC traces and the corresponding transition temperatures of mixed systems

Assignment

Raman  
□/cm<sup>-1</sup>

FTIR  
□/cm<sup>-1</sup>

|                                                                                                |          |          |
|------------------------------------------------------------------------------------------------|----------|----------|
| $\square$ CF <sub>3</sub>                                                                      | 278(ms)  |          |
| $\square$ CF <sub>3</sub> , $\square_a$ CS                                                     | 297(m)   |          |
| $\square$ SO <sub>2</sub> , $\square$ CF <sub>3</sub> , $\square_a$ CS                         | 314(w)   |          |
| $\square$ SO <sub>2</sub>                                                                      | 341(w)   |          |
| $\square$ SO <sub>2</sub>                                                                      | 397(m)   | 397(vw)  |
| $\square$ SO <sub>2</sub>                                                                      |          | 408(w)   |
| $\square_a$ CF <sub>3</sub>                                                                    |          | 512(s)   |
|                                                                                                | 537(vw)  |          |
| $\square$ N-C, $\square_s$ SO <sub>2</sub>                                                     | 552(w)   |          |
| $\square$ N-C, $\square_s$ SO <sub>2</sub> , $\square_a$ CF <sub>3</sub> , $\square_a$ R,      | 570(w)   | 568(s)   |
| $\square^{ip}_s$ R                                                                             |          |          |
| $\square_a$ CF <sub>3</sub> , $\square_a^{ip}$ SO <sub>2</sub> , $\square_s$ N-SO <sub>2</sub> | 590(w)   |          |
| $\square_a$ SO <sub>2</sub> , $\square^{op}_a$ R, $\square_s$ SNS,                             |          | 611(vs)  |
| $\square_a^{op}$ SO <sub>2</sub>                                                               |          |          |
| $\square_s$ CF <sub>3</sub> , $\square_s$ N-SO <sub>2</sub>                                    | 631(vw)  |          |
|                                                                                                | 715(vw)  |          |
| $\square_s$ CF <sub>3</sub>                                                                    | 741(vs)  | 739(m)   |
| $\square_s$ SNS                                                                                |          | 762(w)   |
| $\square$ CS                                                                                   | 798(vw)  | 790(m)   |
|                                                                                                | 824(vw)  |          |
| <b>Ring mode</b>                                                                               | 880(vw)  | 879(vw)  |
| <b>Ring mode</b>                                                                               | 902(m)   |          |
| <b>Ring mode</b>                                                                               |          | 936(w)   |
| <b>Ring mode</b>                                                                               | 998(w)   | 999(w)   |
|                                                                                                |          | 1035(vw) |
| $\square_a$ R, $\square$ CC, $\square$ N-                                                      | 1054(w)  | 1052(s)  |
| CH <sub>3</sub> , $\square_a$ SNS, $\square_a$ SNS                                             |          |          |
| $\square_s$ SO <sub>2</sub>                                                                    | 1141(m)  | 1137(s)  |
| $\square_s$ R, $\square$ N-CH <sub>3</sub> , $\square_a$ CF <sub>3</sub> ,                     |          | 1177(vs) |
| $\square_s$ CF <sub>3</sub> , $\square$ CH <sub>2</sub>                                        | 1243(ms) |          |
| $\square_a^{op}$ SO <sub>2</sub> , $\square$ CH <sub>3</sub> , $\square$ (R)                   | 1336(w)  | 1333(m)  |
| $\square_a^{ip}$ SO <sub>2</sub> , $\square$ (R), $\square_a^{ip}$ SO <sub>2</sub>             | 1355(w)  | 1347(m)  |
|                                                                                                |          | 1405(vw) |
|                                                                                                |          | 1434(vw) |
| $\square$ CH <sub>3</sub> , $\square^{ip}_a$ R                                                 |          |          |
| $\square$ CH <sub>2</sub> , $\square$ CH <sub>3</sub> ,                                        | 1455(m)  |          |
| $\square$ CH <sub>2</sub> , $\square$ CH <sub>3</sub>                                          |          | 1467(w)  |
| $\square$ CH <sub>2</sub>                                                                      | 2852(w)  |          |
| $\square$ CH <sub>2</sub>                                                                      | 2904(s)  | 2904(w)  |
| $\square$ CH <sub>2</sub>                                                                      | 2962(w)  | 2964(vw) |
| $\square$ CH <sub>2</sub>                                                                      | 3000(s)  | 2997(s)  |
|                                                                                                | 3041(w)  | 3042(w)  |

Table S2: Assignment of observed Raman and FTIR bands of [C<sub>2</sub>mpyr][NTf<sub>2</sub>] at room temperature based on literature reports [17, 47, 48, 50, 52] for related cations and anions. [Letters representing the vibrational modes :  $\nu$  - stretching,  $\delta$  - bending,  $\tau$  - twisting,  $\rho$  - rocking,  $\omega$  - wagging, ip - in phase, op - out of phase, s - symmetric, as - asymmetric Letters indicating relative intensities: vw - very weak, w - weak, m - medium, s - strong, vs - very strong]

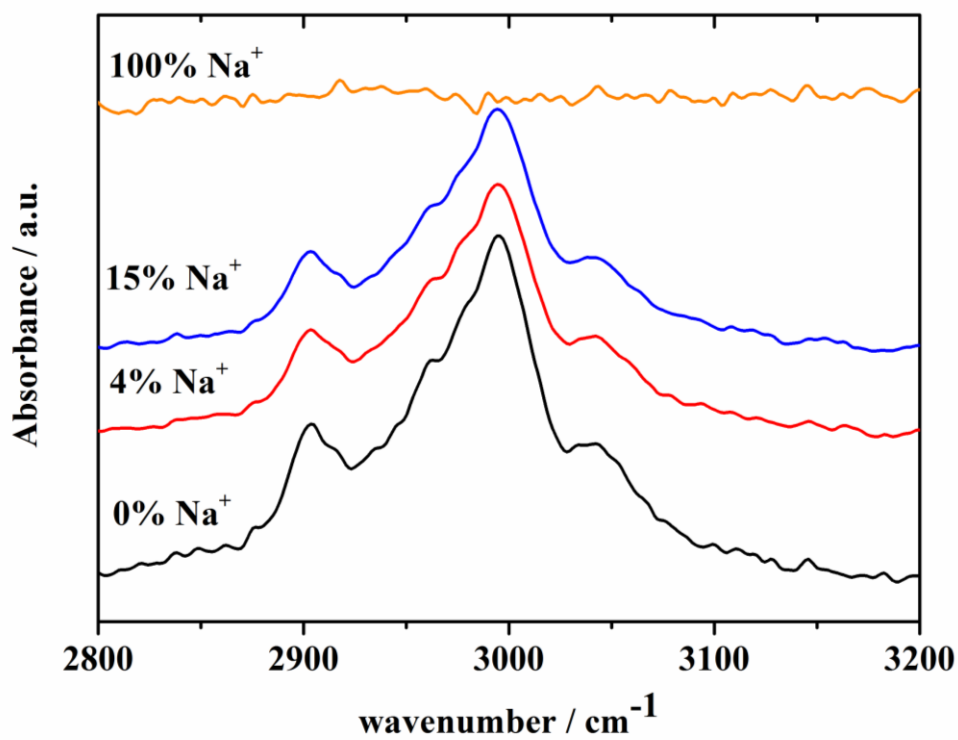

Figure S1. FTIR spectra of pure and mixed materials from 2800 – 3200 $\text{cm}^{-1}$

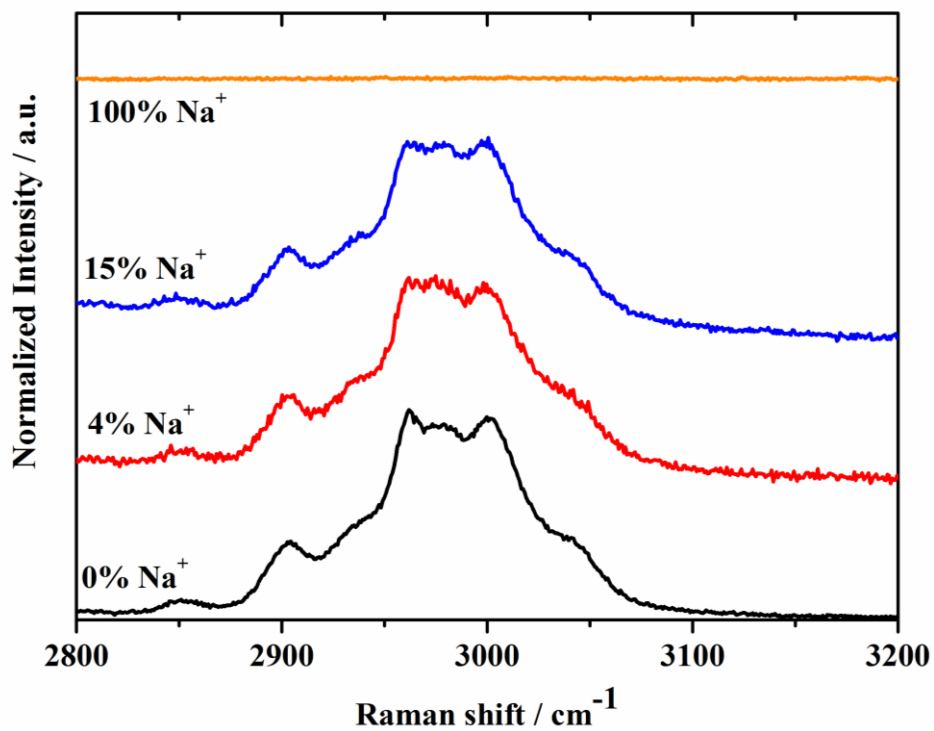

Figure S2. Raman spectra of pure and mixed materials from 2800 – 3200  $\text{cm}^{-1}$
